# Supplementary material for: Scion/Rootstock Interaction Studies for Quality Traits in Mango (Mangifera indica L.) Varieties
Source: MDPI journal article supplement (doi:10.3390/agronomy13010204), 2023-01-09

**Supplementary Table S1.** Description of five mango varieties grafted on three polyembryonic rootstocks.

| Genotypes    | Description                                                                                                                                                                                                                                                                                                                                                                                                                                                                                                                               |
|--------------|-------------------------------------------------------------------------------------------------------------------------------------------------------------------------------------------------------------------------------------------------------------------------------------------------------------------------------------------------------------------------------------------------------------------------------------------------------------------------------------------------------------------------------------------|
| Mallika      | Mallika is a cross between Neelum and Dashehari was released in 1971 by IARI, New Delhi. The fruits have an attractive appearance, with an average weight of 307 gram a pulp percentage of 74% and TSS is (25°Brix). It also has a better keeping quality and also matures later than Dashehari [4,16,34].                                                                                                                                                                                                                                |
| Amrapali     | It has been evolved from a cross between Dashehari and Neelum and released in 1978 by IARI, New Delhi. It is distinctly dwarf precocious, under north Indian conditions, prolific bearer and highly regular. It is suitable for high density planting (2.5 x 2.5 m). The deep orange red in colour and has about 2.5-3.0 times more $\beta$ - carotene content then its parents [4,16, 34].                                                                                                                                               |
| Pusa Arunima | It is a hybrid, derived from the cross between Amrapali and Sensation and released in 2002. It has medium TSS (19.56%) and is rich in vitamin C (43.6 mg/100 g pup) and Beta-carotene content, and has a good flavor with very good shelf-life (10 to 12 days) at room temperature after ripening. It is suitable for domestic market. It can also be accepted in the international markets, because of its attractive red peel color, fibreless pulp, mild flavour, medium TSS, excellent sugar: acid blend and long shelf-life [4, 16]. |
| Pusa Surya   | The fruit is medium to large in size (270 g) with attractive apricot yellow peel colour and medium TSS (18.5%). It is rich in vitamin C (42.6 mg/100 g pulp) and Beta carotene content. It ripens by 3rd week of July. It has good shelf-life (8-10 days) at room temperature after ripening. It is suitable for domestic and international markets [4,16].                                                                                                                                                                               |
| Dashehari    | It is one of the most and popular and important cultivar of north India. The fruit pulp is yellow, firm with almost no fiber, scanty juice and a delightful aroma, very sweet taste of excellent quality [32, 34].                                                                                                                                                                                                                                                                                                                        |
| Olour        | It is a popular polyembryonic rootstock of Malabar district of Tamil Nadu. Fruit maturity is early to medium. Fruits are small sized, oval in shape, pulp is soft and capucine yellow in colour with moderate fiber. Fruit quality aromatic with slight indication of no agreeable turpentine taste [6, 14].                                                                                                                                                                                                                              |
| Kurukkan     | Salt resistant, polyembryonic rootstock, high respiration rate, thin peels thickness and medium level of PME activity. It increased more phenolic compounds as well as polyphenol oxidase enzyme activities [6, 14, 36].                                                                                                                                                                                                                                                                                                                  |
| K-5          | K-5 inhibited vigour in both scion varieties Pusa Arunima and Pusa Surya. Stimulated higher Vitamin C content, high acidity, high peroxidase (POX) activity [6, 14].                                                                                                                                                                                                                                                                                                                                                                      |

**Supplementary Table S2.** List of primer sequences, annealing temperature and product size of shelf-life specific primers used in five mango varieties grafted on three polyembryonic rootstocks.

| S.No. | Primer  | Forward                   | F-TM (°C) | Reverse                  | R-TM (°C) | Annealing temp. (Ta) (°C) | Product size (bp) |
|-------|---------|---------------------------|-----------|--------------------------|-----------|---------------------------|-------------------|
| 1     | MSL-1   | GGGACAAAGAGAC<br>ACACCTGA | 56.7      | CATATTGACAGGG<br>CCAACG  | 53.8      | 55.0                      | 151               |
| 2     | MSL-2   | AGCTCCTGCCAACT<br>AATCCA  | 56.1      | AATGCCTCTGCAA<br>CATCCTC | 55.4      | 55.0                      | 250               |
| 3     | MSL-3   | GTATTGGAGCTGG<br>GTTGGAA  | 54.8      | GTCACACCAAAAC<br>GATGTGC | 54.9      | 55.0                      | 151               |
| 4     | MSL-4   | TTAAGCTTCTTGGG<br>CGAAAA  | 52.6      | TCATGCAAATCGA<br>CTCCTTG | 53.0      | 55.0                      | 158               |
| 5     | MSL-5   | GTGGTGCTCCAC<br>AGTTCTT   | 57.6      | CTGTTGCAGGACC<br>GTAGGTT | 57.2      | 55.0                      | 189               |
| 6     | MSL-6   | CTATCCAGCGAAA<br>CCACAGC  | 56.1      | GCCTTGGGTCCAA<br>AAAGAG  | 54.0      | 55.0                      | 221               |
| 7     | MSL-7   | ACCATCTAGGCGA<br>TTCATGG  | 54.4      | GTTCTGGCCACTG<br>AACCTGT | 57.6      | 55.0                      | 205               |
| 8     | MSL-8   | TGAGAGGACTTCT<br>GGCTCGT  | 57.7      | CGACACTTGCAAG<br>CCAAC   | 56.2      | 55.0                      | 165               |
| 9     | MSL-9   | AGCAGCTTGTTAC<br>TGCTGA   | 57.2      | GACCGTGGTGATG<br>CAAATAA | 53.2      | 55.0                      | 190               |
| 10    | MSL-10  | CATTGCATTGCTCC<br>GATTTA  | 51.2      | CCTCCAAAATGTT<br>CCTTCCA | 52.7      | 55.0                      | 168               |
| 11    | MSL-11  | GTGGTGCTCCAC<br>AGTTCTT   | 57.6      | CTGTTGCAGGACC<br>GTAGGTT | 57.2      | 55.0                      | 189               |
| 12    | MSL-12  | CTCTATTGGGCTG<br>CTCAGG   | 55.4      | GTCAACGGGACCC<br>AAGACTA | 56.5      | 55.0                      | 219               |
| 13    | MSL-13  | GCAATTCGCTGATG<br>TCTCAA  | 53.5      | AGTGCCTCAAAT<br>GGGTTTG  | 53.8      | 55.0                      | 153               |
| 14    | NMSLC-1 | ATTGCCCTGAGATG<br>ACCAAC  | 55.1      | TTTCTTGAACGGTG<br>CACTTG | 53.8      | 55.0                      | 163               |
| 15    | NMSLC-2 | TGAAGCCATGAAA<br>GCTGTTG  | 53.7      | AATGAAGGGGAG<br>ACAAGGTC | 54.3      | 55.0                      | 233               |
| 16    | NMSLC-3 | AGACAGCAAGTGT<br>TGCTCCA  | 56.9      | GTCCGGGTAAGTG<br>TCCTTGA | 56.5      | 55.0                      | 210               |
| 17    | NMSLC-4 | CCAAGTGAAGTTG<br>GGGACAT  | 55.1      | TTCCAACCCAGCT<br>CCAATAC | 54.8      | 55.0                      | 219               |
| 18    | NMSLC-5 | GCACATCGTTTTGG<br>TGTGAC  | 54.9      | GGTCGAATCCCAT<br>CATCAAC | 53.4      | 55.0                      | 188               |
| 19    | NMSLC-6 | GCCTGATCCAAAC             | 54.8      | CTGTGGATTGGGG            | 55.4      | 48.5                      | 214               |

|    |          |                                |      |                           |      |      |     |
|----|----------|--------------------------------|------|---------------------------|------|------|-----|
|    |          | TGAGGAA                        |      | TGTAAGG                   |      |      |     |
| 20 | NMSLC-7  | GAGATTGCGATTG<br>CAGTGAA       | 53.5 | CAGAATCAAGGGG<br>TTTGCTC  | 53.8 | 52.0 | 215 |
| 21 | NMSLC-8  | ATGGGGCACAGAT<br>TACTTCG       | 54.8 | GCGTGAGTAATG<br>TGGGTTT   | 55.5 | 55.0 | 236 |
| 22 | NMSLC-9  | TGAGCAAGCATGG<br>AATGAAG       | 53.3 | TTCCATTAGGGTCT<br>CGCATC  | 54.3 | 55.0 | 155 |
| 23 | NMSLC-10 | ATTAACCGGAAGG<br>CCATGTT       | 54.6 | TGAGTGGCCAGTA<br>AAAAGCA  | 54.7 | 55.0 | 152 |
| 24 | NMSLC-11 | GCTTGTGCAGCCTA<br>AATGGT       | 56.1 | CAATAGCTGGGGC<br>TGGAATA  | 54.5 | 55.0 | 209 |
| 25 | NMSLC-12 | TTTCCATGTTCAGC<br>AGTTTGA      | 52.8 | AAAACCATCATCC<br>CACAACAA | 52.9 | 48.5 | 216 |
| 26 | NMSLC-13 | TGGGCTGTATTGG<br>TTGCAG        | 53.8 | CCTTGGCTTCCCAG<br>AAGTAA  | 54.5 | 55.0 | 158 |
| 27 | NMSLC-14 | GATTCACGTAAGA<br>ATAAACATTTTCG | 50.8 | AATTGGTGTGCAA<br>GTGGTGA  | 55.2 | 55.0 | 192 |
| 28 | EXPM-1   | GGCAATGGTAGGT<br>TTGAGCA       | 55.6 | TACCATACCCACA<br>CGCTCCT  | 57.9 | 55.0 | 173 |
| 29 | EXPM-2   | CAATGGTAGGTTTG<br>AGCATGG      | 54.0 | CACCACAAC TGAA<br>CCCATTG | 54.3 | 55.0 | 249 |
| 30 | EXPM-3   | ATGGCCTGCATTCT<br>GTCTCT       | 56.4 | AGCATGCACCACA<br>ACTGAAC  | 56.2 | 55.0 | 238 |
| 31 | EXPM-4   | TACCTTTACGGCG<br>GTTCTG        | 54.9 | TGCACACTTGATT<br>CGAAGC   | 53.9 | 55.0 | 160 |
| 32 | EXPM-5   | TGCTTCGAAATCA<br>AGTGTGC       | 53.9 | CATGGCAAGGTCA<br>AAATGTG  | 52.6 | 51.0 | 159 |
| 33 | EXPM-6   | CAAAC TACGCCCT<br>ACCAAGC      | 56.0 | TAACGCTCACCTTC<br>ACGATG  | 54.9 | 51.0 | 246 |
| 34 | EXPM-7   | CGAGCTGGTATTGT<br>CCCAGT       | 56.8 | GCCAGTTTTGACCC<br>CAGTTA  | 55.3 | 55.0 | 202 |
| 35 | EXPM-8   | CATCGTGAAGGTG<br>AGCGTTA       | 54.9 | TCTTCCGACGAAT<br>GTTTGA   | 52.0 | 48.5 | 200 |

**Supplementary Table S3.** Distribution of five mango varieties grafted on three polyembryonic rootstocks in different clusters using shelf-life specific primers.

| Cluster  | Number of rootstock(s) and scion/rootstock(s) in cluster            | Total Population |
|----------|---------------------------------------------------------------------|------------------|
| <b>A</b> | 5 (PS/K-5, PA/K-5, D/K-5, A/K-5, M/K-5)                             | 33.33 %          |
| <b>B</b> | 10 (D/OL, M/KU, A/KU, PS/KU, M/OL, PS/OL, D/KU, PA/KU, A/OL, PA/OL) | 66.66 %          |

1.PusaArunima/Kurukkan (PA/KU), 2.Pusa Surya/Kurukkan (PS/KU), 3.Amrapali/Kurukkan(A/KU), 4.Mallika/Kurukkan(M/KU), 5.Dashehari/Kurukkan (D/KU), 6.Pusa Arunima/Olour (PA/OL), 7.Pusa Surya/Olour

(PS/OL), 8. Amrapali/Olour (A/OL), 9. Mallika/Olour (M/OL), 10. Dashehari/Olour (D/OL), 11. Pusa Arunima/K-5 (PA/K-5), 12. Pusa Surya/K-5 (PS/K-5), 13. Amrapali/K-5 (A/K-5), 14. Mallika/K-5 (M/K-5), 15. Dashehari/K-5 (D/K-5)

**Figure S1** Variance explained by Principal Component (individual and cumulative) for various fruit quality traits in 15 scion/rootstock combinations.

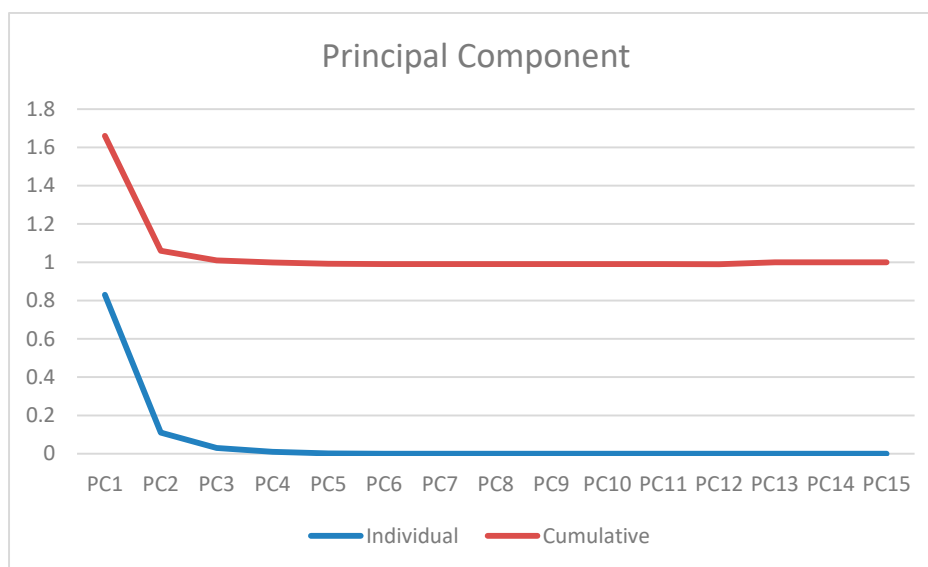

**Figure S2.** Molecular profiling of five mango varieties grafted on three polyembryonic rootstocks using shelf-life specific simple sequence repeat locus NMSLC-14.

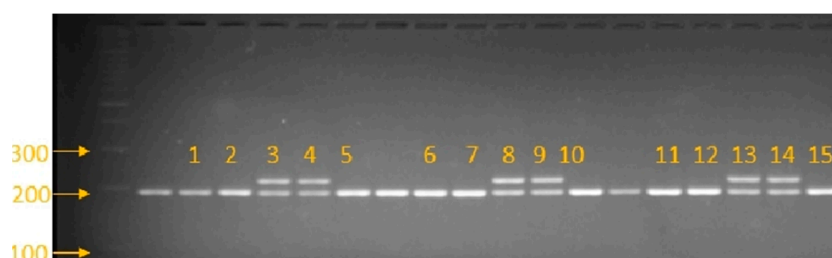

L- 100 bp ladder 1. Pusa Arunima/Kurukkan, 2. Pusa Surya/Kurukkan, 3. Amrapali/ Kurukkan, 4. Mallika/Kurukkan, 5. Dashehari/Kurukkan, 6. Pusa Arunima/Olour, 7. Pusa Surya/Olour, 8. Amrapali/Olour, 9. Mallika/Olour, 10. Dashehari/Olour, 11. Pusa Arunima/K-5, 12. Pusa Surya/K-5, 13. Amrapali/K-5, 14. Mallika/K-5, 15. Dashehari/K-5.

**Figure S3 (A, B & C).** Model based population structure plot for each variety with  $K=2$ , using Structure with 24 SSR markers. Color codes are as follows: Population A red, Population B green, population. Delta  $K$  vs  $KE$ anno plot showing  $K=2$  having the peak delta  $K$  value, suggesting existence of two sub-populations in 15 scion/rootstock combinations.

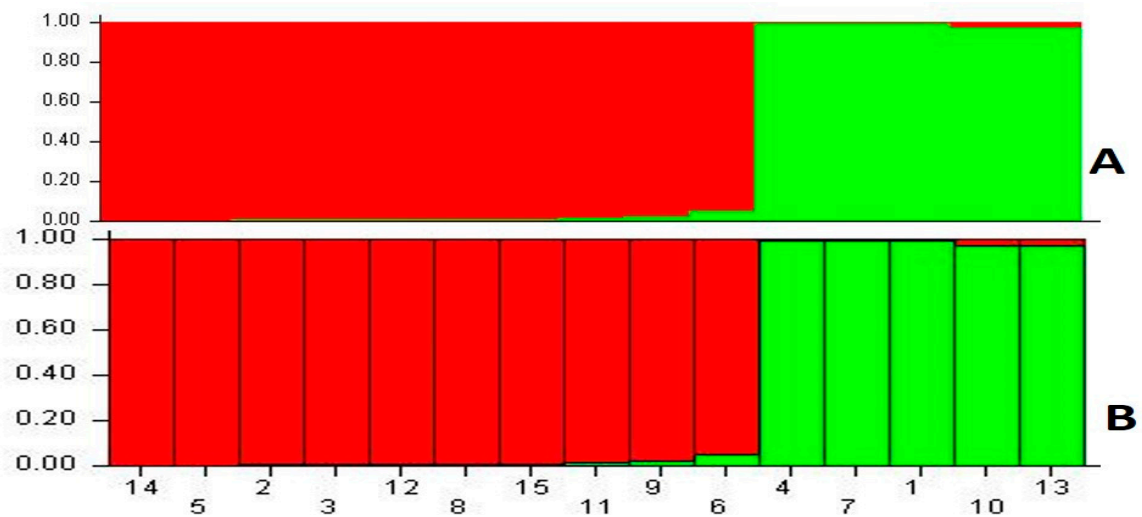

1. PusaArunima/Kurukkan(PA/KU), 2.Pusa Surya/Kurukkan (PS/KU), 3.Amrapali/Kurukkan(A/KU), 4.Mallika/Kurukkan(M/KU), 5.Dashehari/Kurukkan (D/KU), 6.Pusa Arunima/Olour (PA/OL), 7.Pusa Surya/Olour (PS/OL), 8.Amrapali/Olour(A/OL), 9. Mallika/Olour (M/OL), 10. Dashehari/Olour (D/OL), 11. Pusa Arunima/K-5 (PA/K-5), 12. Pusa Surya/K-5 (PS/K-5), 13. Amrapali/K-5 (A/K-5), 14. Mallika/K-5 (M/K-5), 15. Dashehari/K-5 (D/K-5).

C

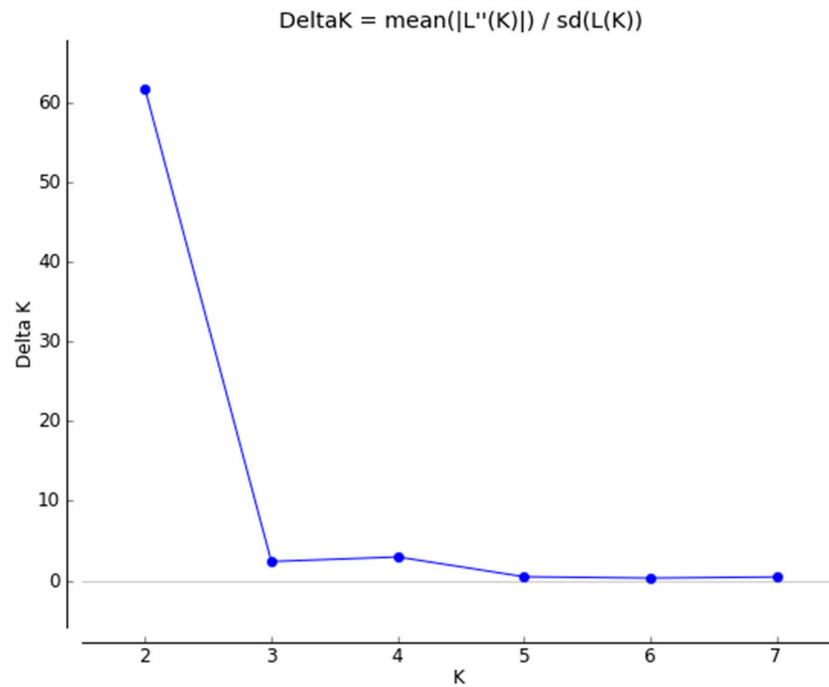

Figure S4 Quantile–quantile (QQ) plots showing the distribution of observed versus expected p values. Significant associations were observed for fruit weight, yield efficiency, peel thickness, pulp percent, total soluble solids and acidity.

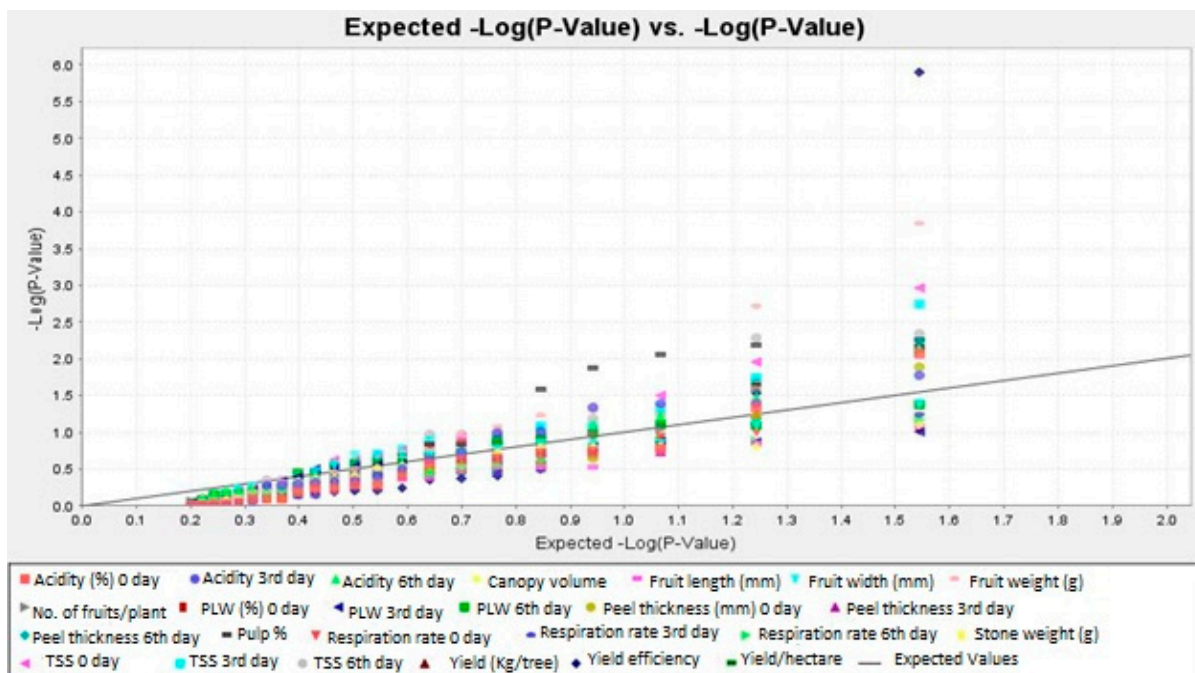

Figures S5 Mapchart indicating the position and relative distance of the tested markers on different mango chromosomes.

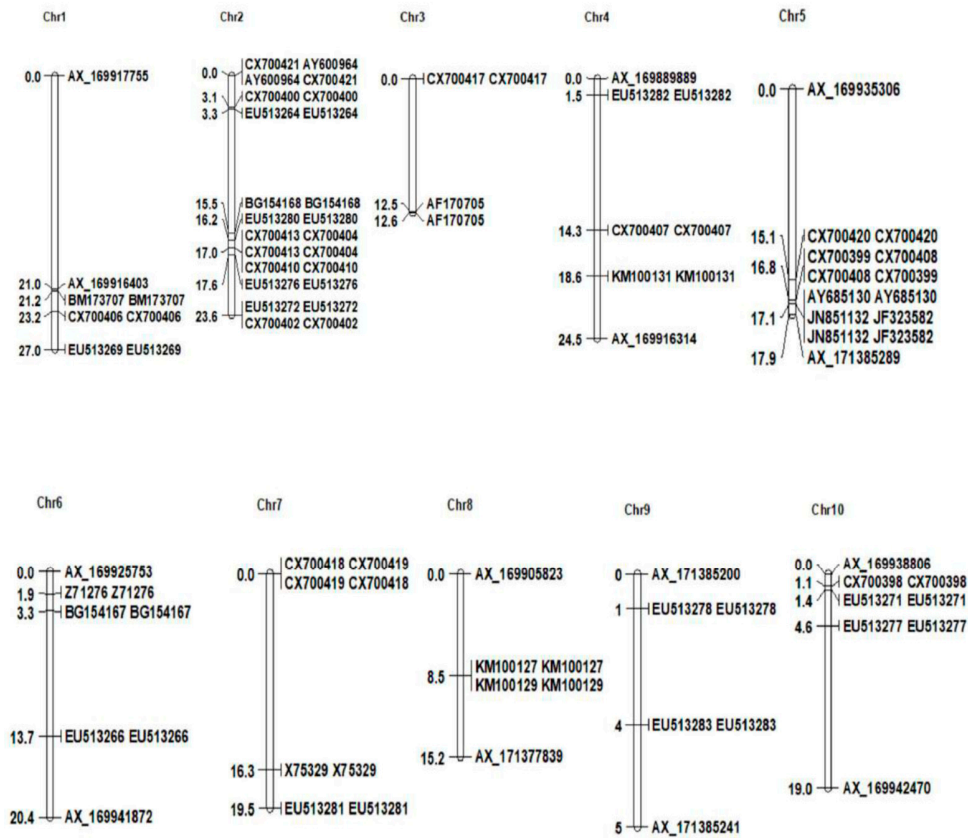

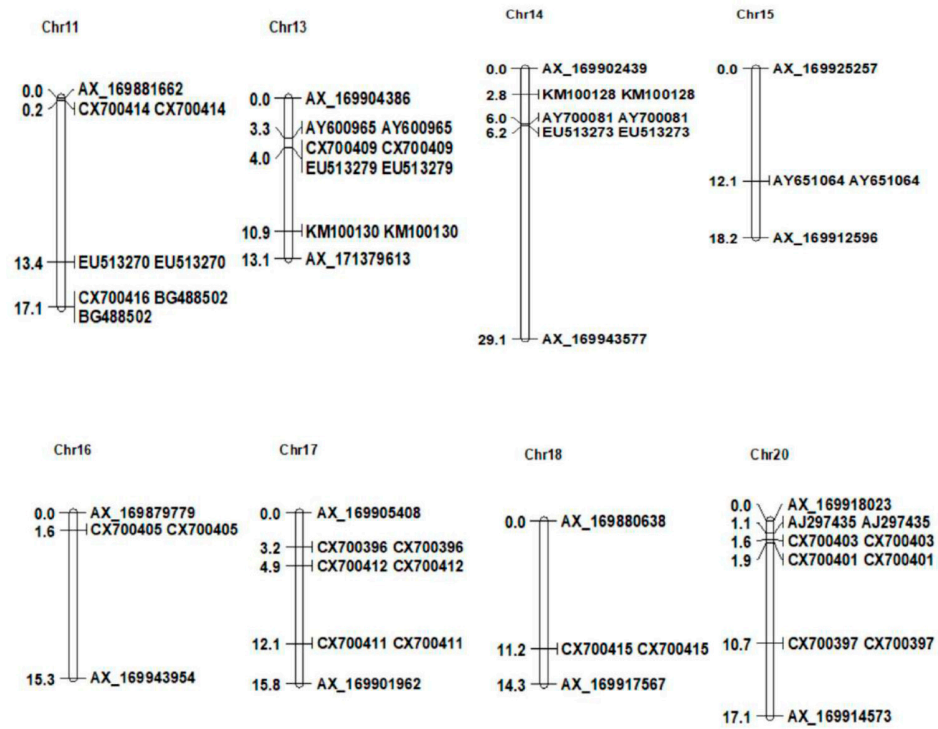

Supplement: s1 [file s1]
